# Supplementary material
Source: PubMed Central journal article supplement (PMC10715380)
Supplement: i2331-348X-28-8-704_s01.pdf [file i2331-348X-28-8-704_s01.pdf]

**Table S1.** Mental health categories by corresponding events.

| Category                                                      | Events                                                                                                                                                                                                                                                                                                                                                                                                                                                                                                                                                                                                           |
|---------------------------------------------------------------|------------------------------------------------------------------------------------------------------------------------------------------------------------------------------------------------------------------------------------------------------------------------------------------------------------------------------------------------------------------------------------------------------------------------------------------------------------------------------------------------------------------------------------------------------------------------------------------------------------------|
| Aggression Symptoms and Disorders                             | Anger, Affect Lability, Agitation, Aggression, Disruptive Mood, Dysregulation Disorder, Fight in School, Frustration Tolerance Decreased, Homicidal Ideation, Hostility, Irritability, Violence-Related Symptom, Verbal Abuse, Defiant Behavior, Physical Assault                                                                                                                                                                                                                                                                                                                                                |
| Anxiety Symptoms and Disorders                                | Agoraphobia, Animal Phobia, Antisocial Behavior, Anxiety, Anxiety Disorder, Autophobia, Emotional Distress, Fear, Fear of Crowded Places, Fear of Death, Fear of Disease, Fear of Eating, Generalized Anxiety Disorder, Nervousness, Nocturnal Fear, Panic Attack, Panic Disorder, Panic Reaction, Paranoia, Phobia, Phobic Avoidance, Photophobia, Separation Anxiety Disorder, Social Anxiety Disorder, Social Avoidant Behavior, Social Fear                                                                                                                                                                  |
| Attention-deficit/Hyperactivity (ADHD) Symptoms and Disorders | Attention-deficit Hyperactivity Disorder, Daydreaming, Psychomotor Hyperactivity                                                                                                                                                                                                                                                                                                                                                                                                                                                                                                                                 |
| Depression Symptoms and Disorders                             | Apathy, Crying, Decreased Interest, Depressed Mood, Depression, Depressive Symptom, Dysphoria, Emotional Poverty, Feeling Guilty, Feeling of Despair, Feelings of Worthlessness, Flat Affect, Listless, Major Depression, Malaise, Morbid Thoughts, Morose, Negative Thoughts, Negativism, Self-Esteem Decreased, Tearfulness                                                                                                                                                                                                                                                                                    |
| Sleep Disorder                                                | Abnormal Dreams, Hypersomnia, Nightmare, Sleep Terror Somnambulism, Somnolence                                                                                                                                                                                                                                                                                                                                                                                                                                                                                                                                   |
| Suicidal Behavior                                             | Depression Suicidal,* Intentional Overdose, Intentional Self-Injury, Self-Injurious Ideation, Suicidal Behavior, Suicidal Ideation, Suicide Attempt, Suicide Threat                                                                                                                                                                                                                                                                                                                                                                                                                                              |
| Completed Suicide                                             | Completed Suicide                                                                                                                                                                                                                                                                                                                                                                                                                                                                                                                                                                                                |
| Other Mental Health Disorders                                 | Alice in Wonderland Syndrome, Asocial Behavior, Attention Seeking Behavior, Behavior Disorder, Drug Abuse, Drug Dependence, Euphoric Mood, Impulse-Control Disorder, Impulsive Behavior, Oppositional Defiant Disorder, Dissociation, Dissociative Disorder, Psychomotor Skills Impaired, Psychiatric Symptoms, Psychotic Symptom, Dysmetropsia, Emotional Disorder, Oversensing, Paresthesia, Mood Altered, Neurotransmitter Level Altered, Neuropsychiatric Symptom, Neuropsychiatric Symptoms, Somnolence, Disinhibition, Disturbance in Social Behavior, Mood Swings, Mixed Anxiety and Depressive Disorder† |

\* Depression Suicidal was included in the Suicidal Behavior category for the purpose of analysis.

† Given the duality of the event Mixed Anxiety and Depressive Disorder was included in the Other Mental Health Disorders category for the purpose of analysis.
